# Supplementary material for: Implicit Incentives Among Reddit Users to Prioritize Attention Over Privacy and Reveal Their Faces When Discussing Direct-to-Consumer Genetic Test Results: Topic and Attention Analysis
Source: JMIR Infodemiology. 2022 Aug 3;2(2):e35702. doi: 10.2196/35702 (PMC9987181; doi:10.2196/35702)
Supplement: Multimedia Appendix 1 [file infodemiology_v2i2e35702_app1.docx]

Supplemental Material for “Prioritizing Attention over Privacy: Reddit Users are Implicitly Incentivized to Reveal Their Face When Discussing Their Direct-to-Consumer Genetic Test Results”

Yongtai Liu, MS1, Zhijun Yin, PhD1,2, Zhiyu Wan, PhD2, Chao Yan, PhD2, Weiyi Xia, PhD2, Congning Ni, MS1, Ellen Wright Clayton, MD, JD3,4,5, Yevgeniy Vorobeychik, PhD6, Murat Kantarcioglu, PhD7, Bradley A. Malin, PhD1,2,8

1Department of Computer Science, Vanderbilt University, Nashville, TN;

2Department of Biomedical Informatics, Vanderbilt University Medical Center, Nashville, TN;

3School of Law, Vanderbilt University, Nashville, TN;

4Department of Pediatrics, Vanderbilt University Medical Center, Nashville, TN;

5Department of Health Policy, Vanderbilt University Medical Center, Nashville, TN;

6Department of Computer Science and Engineering, Washington University in St. Louis, St. Louis, MO;

7Department of Computer Science, University of Texas at Dallas, Richardson, TX;

8Department of Biostatistics, Vanderbilt University Medical Center, Nashville, TN

Corresponding Author:

Bradley A. Malin, PhD

2525 West End Ave. Suite 1030, Nashville, TN, 37203

Department of Biomedical Informatics, Vanderbilt University Medical Center

Email: b.malin@vumc.org

## Section A. Topic Modeling

Figure 1 illustrates the change in coherence score as a function of the number of topics. We selected 10 as the number of topics, as it achieved the highest coherence score (0.391).

Figure 2 displays the distribution of the three post types and 10 topics in a 2D t-SNE scatterplot. Instead of showing all the posts in one figure, we selected 10% (1,587/15,596) of the most relevant posts to their dominant topics (the topic with the largest proportion). All the selected posts achieved a relevance score (the relevance between the post and its dominant topic) higher than 0.155. In general, the 10 clusters in Figure 8 are well separated, but cluster T5 (rhombus-shaped) and cluster T9 (pentagon-shaped) were close to each other, which suggests these two topics have a high degree of similarity.


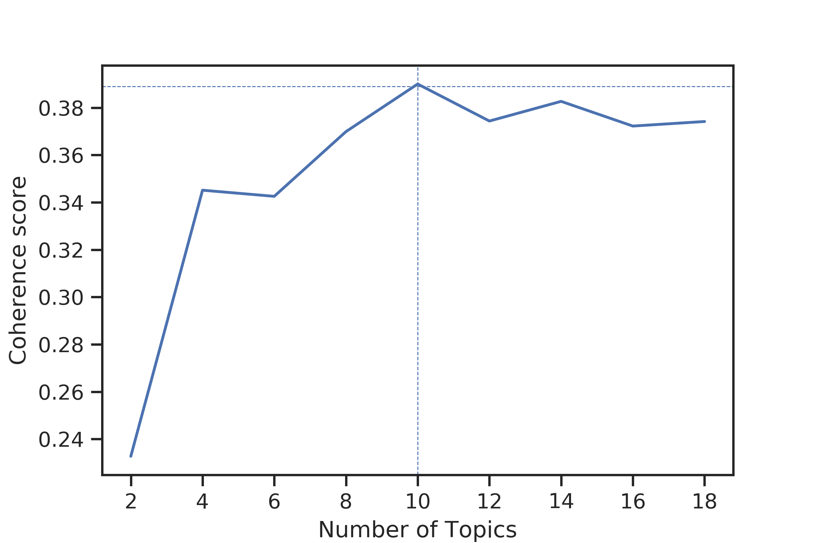


**Figure 1. Coherence score as a function of the number of topics.**


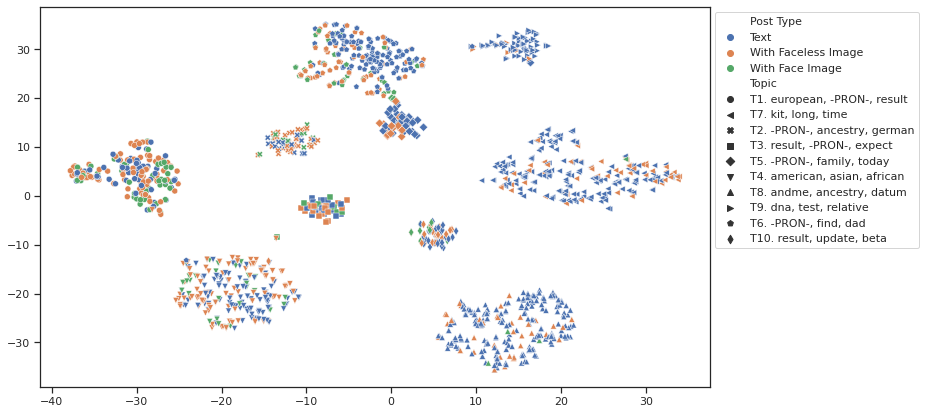


**Figure 2. t-SNE clustering result of 1,587 selected posts in 10 topics, the markers represent posts. The relevance between selected posts and their dominant topic is greater than 0.155.**

## Section B.

## Boxplots of the Entire Dataset


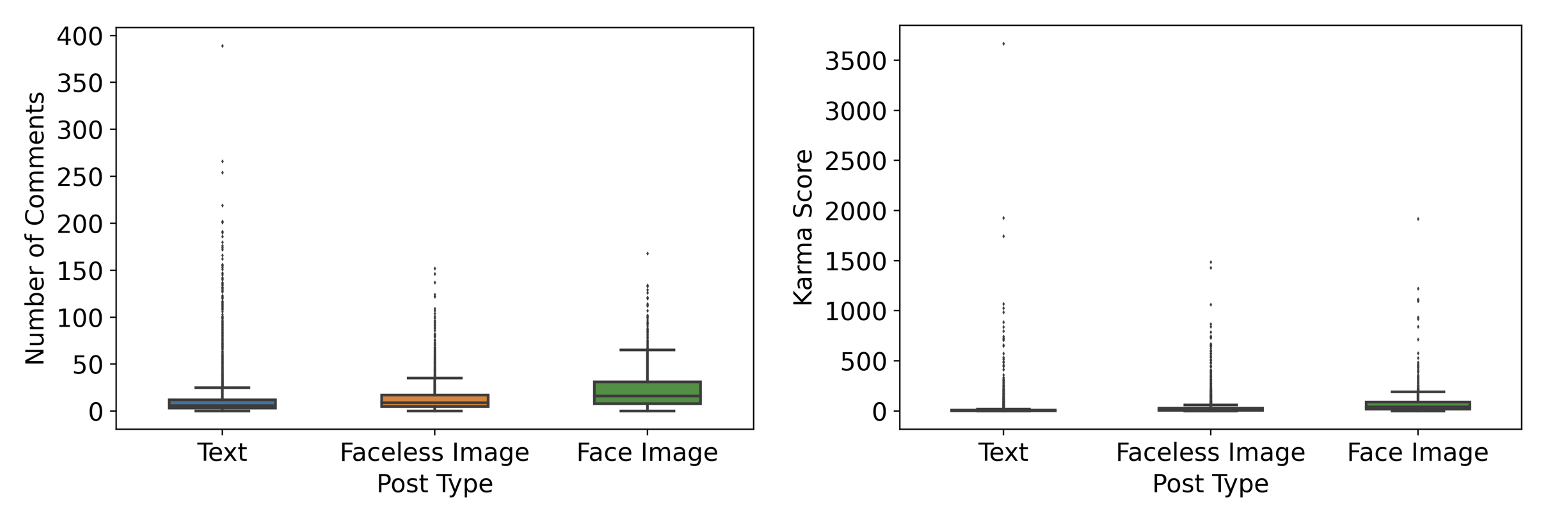


**Figure 3. Attention for three types of posts of entire data: number of comments per post (left) and Karma score per post (right).**


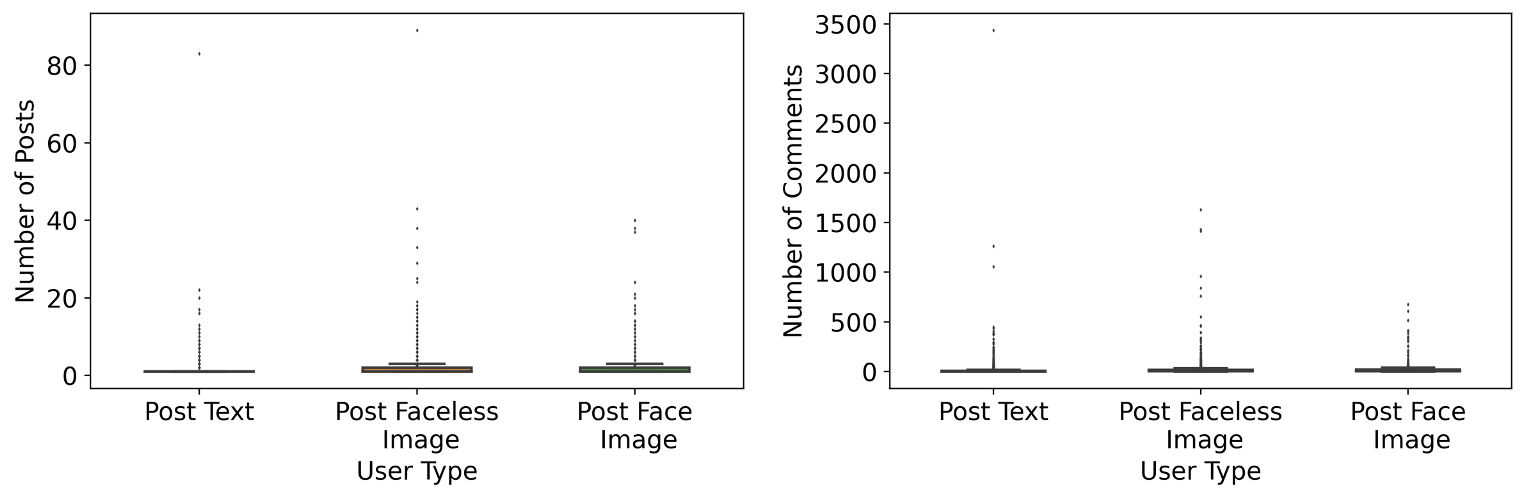


**Figure 4. Number of posts per user (left) and number of comments per user (right) for users who post 1) text only, 2) a faceless image, and 3) a face image.**
